# Supplementary material for: Hepatocellular Metabolic Abnormalities Induced by Long-Term Exposure to Novel Brominated Flame Retardant, Hexabromobenzene
Source: MDPI journal article supplement (doi:10.3390/toxics11020101), 2023-01-21
Supplement: s1 [file s1]

Supplementary information for

## **Hepatocellular metabolic abnormalities induced by long-term exposure to novel brominated flame retardant, hexabromobenzene**

Bohyun Shin, Se Hee Hong, Sumin Seo, Cho Hee Jeong, Jiyu Kim, Eunbin Bae, Donghee Lee, Jung Hoon Shin, Minki Shim, Sang Beom Han\*, Dong-Kyu Lee\*

*College of Pharmacy, Chung-Ang University, 84 Heukseok-ro, Dongjak-gu, Seoul 06974, Republic of Korea*

\* Corresponding Author:

Sang Beom Han, Ph.D.

College of Pharmacy, Chung-Ang University

84 Heukseok-ro, Dongjak-Gu

Seoul 06974, Republic of Korea

Tel: +92-2-820-5596

Fax: +82-2-3280-5597

E-mail:hansb@cau.ac.kr

\* Corresponding Author:

Dong-Kyu Lee, Ph.D.

College of Pharmacy, Chung-Ang University

84 Heukseok-ro, Dongjak-Gu

Seoul 06974, Republic of Korea

Tel: +92-2-820-5854

Fax: +82-2-3280-5854

E-mail:leedk@cau.ac.kr

**Figure S1.** Morphology of HepG2 cells at a magnification 100 $\times$ . (A) control; (B) HBB treated for 21 days.

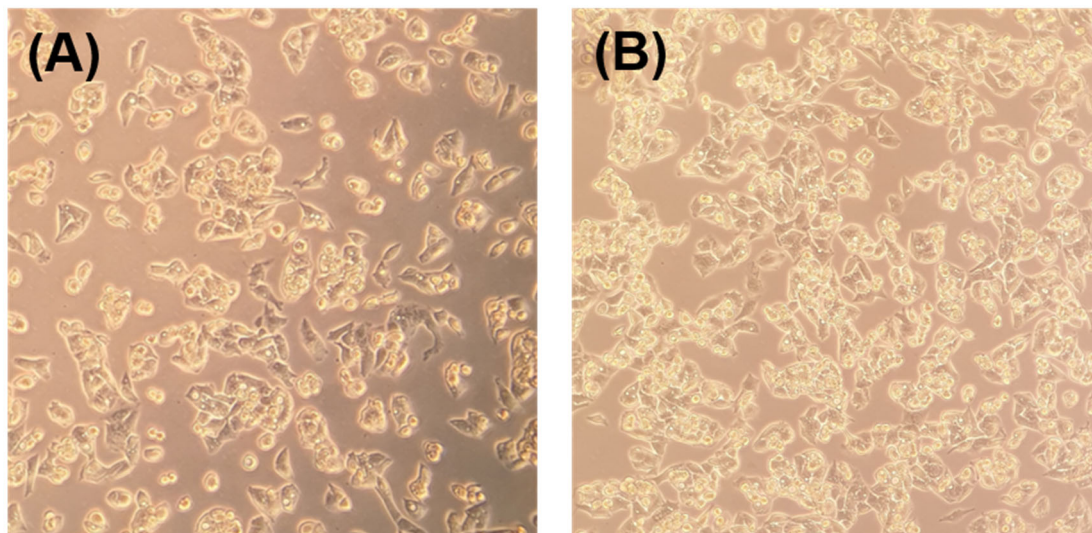

**Figure S2.** Effect of HBB on HepG2 cell viability. HepG2 cells were exposed to DMSO or HBB (0.05, 0.1, 0.5, 1  $\mu\text{g/mL}$ ) for 24 h and 48 h on a culture medium. Data are shown as the mean of the percentage of control  $\pm$  standard deviation for  $n = 9$ , obtained from three independent experiments. (\*\* $p < 0.01$ , \*\*\*\* $p < 0.0001$ )

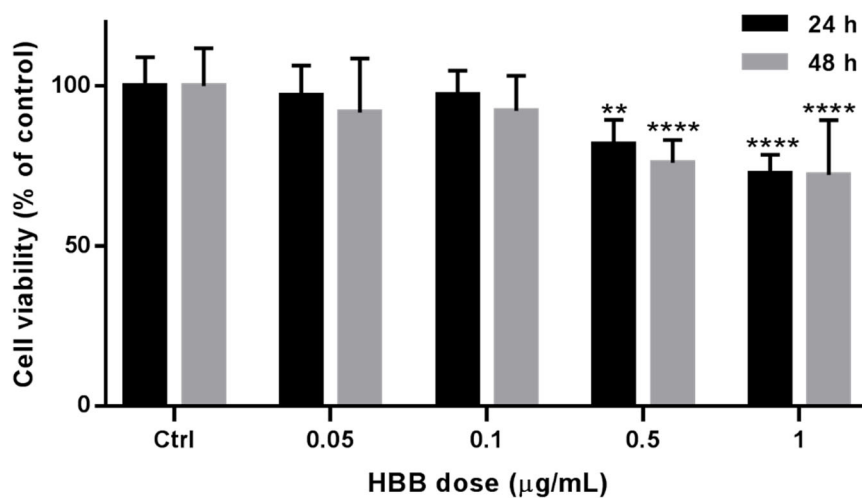

**Figure S3.** (A) PCA score plots of control group (green,  $n = 18$ ), HBB-exposed group (blue,  $n = 18$ ), and QC (red,  $n = 5$ ) and (B) cross-validation result of PCA.

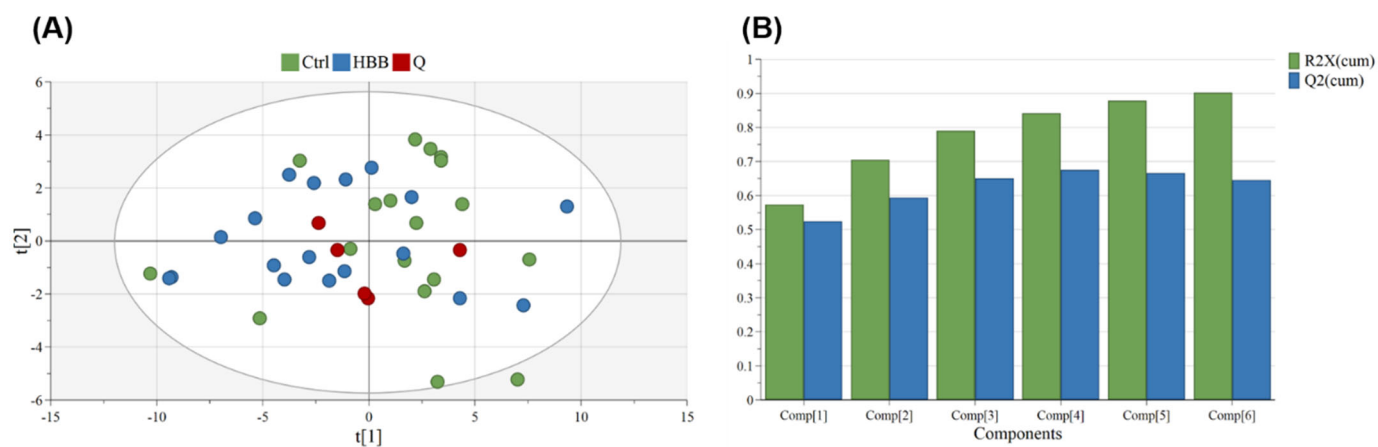

**Figure S4.** (A) OPLS-DA score plot of short-term (green; 3, 7 d;  $n = 6$ ) and long-term (blue; 15, 17, 21 d;  $n = 9$ ) HBB exposure, (B) OPLS-DA permutation test result.

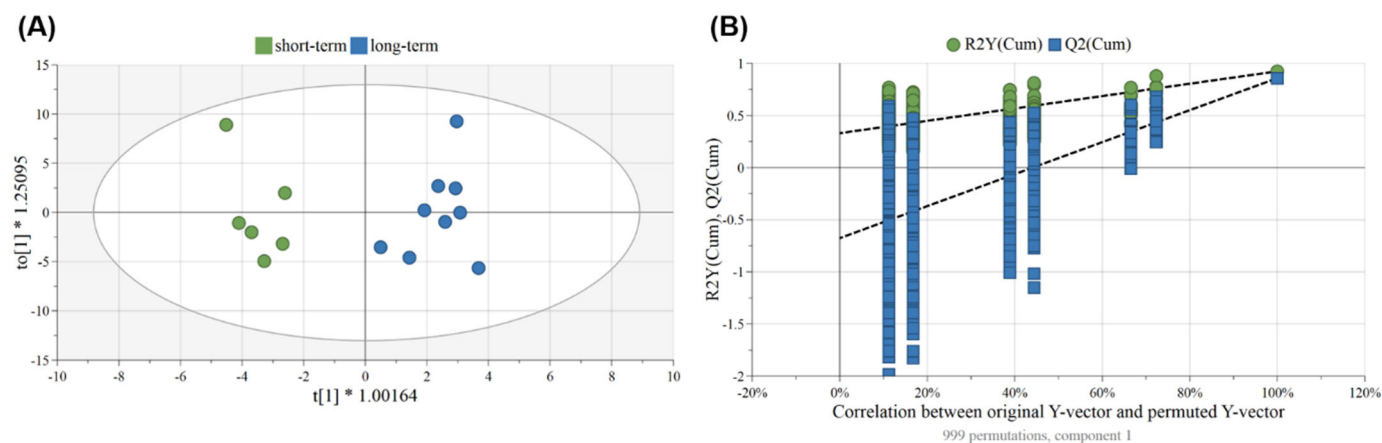

**Table S1.** List of identified metabolites.

| No. | Metabolite               | KEGG ID | Retention index | Retention time (min) | Target m/z | Fragmentation ion (m/z)     | TMS <sup>1)</sup> | CV (%) | Identification |                   |
|-----|--------------------------|---------|-----------------|----------------------|------------|-----------------------------|-------------------|--------|----------------|-------------------|
|     |                          |         |                 |                      |            |                             |                   |        | library        | STD <sup>4)</sup> |
| 1   | Lactic acid              | C00186  | 1071            | 9.16                 | 73         | 73, 147, 117, 45            | 2                 | 18.2   | O              |                   |
| 2   | Alanine                  | C00041  | 1106            | 10.71                | 116        | 116, 73, 147, 117           | 2                 | 23.9   | O              | O                 |
| 3   | Valine                   | C00183  | 1216            | 15.82                | 144        | 144, 73, 147, 218           | 2                 | 26.8   | O              | O                 |
| 4   | Urea                     | C00086  | 1251            | 17.7                 | 73         | 147, 73, 189, 171           | 2                 | 18.8   | O              |                   |
| 5   | 2-Aminoethanol           | C00189  | 1266            | 18.51                | 174        | 174, 73, 100, 147           | 3                 | 13.5   | O              |                   |
| 6   | Leucine                  | C00123  | 1274            | 18.99                | 158        | 158, 73, 102, 147           | 2                 | 25.4   | O              | O                 |
| 7   | Glycerol                 | C00116  | 1279            | 19.21                | 73         | 73, 147, 205, 117, 103      | 3                 | 15.5   | O              |                   |
| 8   | Isoleucine               | C00407  | 1293            | 20                   | 158        | 158, 73, 218, 147           | 2                 | 17.5   | O              | O                 |
| 9   | Glycine                  | C00037  | 1303            | 20.51                | 174        | 174, 73, 147, 86, 248       | 3                 | 15.9   | O              |                   |
| 10  | Succinic acid            | C00042  | 1316            | 21.15                | 147        | 147, 73, 75, 247            | 2                 | 16.2   | O              |                   |
| 11  | Fumaric acid             | C00122  | 1354            | 23.03                | 245        | 73, 147, 245, 75            | 2                 | 16     | O              |                   |
| 12  | Serine                   | C00065  | 1363            | 23.51                | 73         | 73, 204, 218, 147, 100      | 3                 | 11.4   | O              | O                 |
| 13  | Threonine                | C00188  | 1387            | 24.7                 | 73         | 73, 117, 218, 219, 101      | 3                 | 8.2    | O              |                   |
| 14  | beta alanine             | C00099  | 1426            | 26.49                | 248        | 73, 147, 174, 248, 45       | 3                 | 15.7   | O              |                   |
| 15  | Aminomalonic acid        | C00872  | 1470            | 28.44                | 73         | 73, 147, 218, 45, 86        | 3                 | 18.1   | O              |                   |
| 16  | Malic acid               | C00149  | 1492            | 29.44                | 73         | 73, 147, 233, 45            | 3                 | 10.7   | O              |                   |
| 17  | Pyroglutamic acid        | C01879  | 1514            | 30.38                | 156        | 73, 156, 147, 45, 230, 258  | 2                 | 10.6   | O              |                   |
| 18  | Aspartic acid            | C00049  | 1523            | 30.74                | 73         | 73, 232, 100, 147           | 3                 | 19.3   | O              |                   |
| 19  | Creatinine               | C00791  | 1532            | 31.69                | 115        | 115, 73, 143, 100, 329      | 3                 | 8.7    | O              | O                 |
| 20  | Cysteine                 | C00097  | 1554            | 32.02                | 73         | 73, 220, 218, 100           | 3                 | 17.7   | O              | O                 |
| 21  | Phenylalanine            | C00079  | 1617            | 34.65                | 73         | 73, 218, 192, 147, 100      | 2                 | 18.4   | O              |                   |
| 22  | Glutamic acid            | C00025  | 1621            | 34.83                | 73         | 73, 246, 128, 147           | 3                 | 19.1   | O              | O                 |
| 23  | Ribose                   | C00121  | 1681            | 37.36                | 73         | 73, 103, 217, 307           | 4                 | 14.9   | O              | O                 |
| 24  | alpha-Glycerophosphate   | C00093  | 1767            | 40.75                | 73         | 73, 299, 357, 147           | 4                 | 12.5   | O              |                   |
| 25  | Glutamine                | C00064  | 1774            | 41.01                | 73         | 73, 156, 155, 147, 245      | 3                 | 14.1   | O              |                   |
| 26  | 3-Phosphoglyceric acid   | C00197  | 1810            | 42.31                | 73         | 73, 299, 147, 227, 101, 357 | 4                 | 20.1   | O              |                   |
| 27  | Citric acid              | C00158  | 1821            | 42.69                | 73         | 73, 273, 147, 75, 45        | 4                 | 15.2   | O              | O                 |
| 28  | d-Erythrotetrofuranose   |         | 1830            | 42.96                | 73         | 73, 147, 218, 191           | 3                 | 14.6   | O              |                   |
| 29  | Fructose <sup>2)</sup>   | C00095  | 1874            | 44.41                | 103        | 73, 103, 217, 147, 307      | 5 <sup>3)</sup>   | 15.9   | O              | O                 |
| 30  | Fructose <sup>2)</sup>   | C00095  | 1884            | 44.72                | 103        | 73, 103, 217, 147, 307      | 5 <sup>3)</sup>   | 18.2   | O              | O                 |
| 31  | Mannose                  | C00159  | 1888            | 44.83                | 73         | 73, 147, 129, 103, 319      | 5 <sup>3)</sup>   | 20.1   | O              | O                 |
| 32  | Glucose <sup>2)</sup>    | C00031  | 1897            | 45.15                | 73         | 73, 147, 319, 205, 103      | 5 <sup>3)</sup>   | 16.5   | O              | O                 |
| 33  | Glucose <sup>2)</sup>    | C00031  | 1914            | 45.64                | 73         | 73, 147, 319, 205, 103      | 5 <sup>3)</sup>   | 18.3   | O              | O                 |
| 34  | Pantothenic acid         | C00864  | 1987            | 47.77                | 73         | 73, 103, 117, 157, 291      | 3                 | 17.8   | O              |                   |
| 35  | Myo-Inositol             | C00137  | 2086            | 50.66                | 73         | 73, 147, 217, 305, 191      | 6                 | 17.8   | O              |                   |
| 36  | Fructose 1-phosphate     | C01094  | 2295            | 54.69                | 73         | 73, 387, 103, 147, 299      | 6 <sup>3)</sup>   | 29.2   |                | O                 |
| 37  | myo-Inositol 1-phosphate | C04006  | 2407            | 56.24                | 73         | 73, 318, 315, 147, 299      | 7                 | 23.4   | O              |                   |
| 38  | Inosine                  | C00294  | 2567            | 58.15                | 73         | 73, 217, 230, 245, 103      | 4                 | 18.6   | O              |                   |
| 39  | Sucrose                  | C00089  | 2632            | 58.84                | 73         | 73, 361, 147, 217, 103      | 8                 | 21.4   | O              |                   |

1) Number of trimethylsilylation in each compound

2) Peak splitted

3) Methoxiaminated

4) Confirmed by standard compound

**Table S2.** Statistical results of comparison of control and HBB exposure group.

| Metabolites              | VIP<br>( $\geq 1$ ) | Metabolites              | <i>p</i> -value<br>( $< 0.05$ ) | Metabolites              | Fold change<br>( $\geq 1.2$ or $\leq 0.8$ ) |
|--------------------------|---------------------|--------------------------|---------------------------------|--------------------------|---------------------------------------------|
| myo-Inositol 1-phosphate | 2.06                | Urea                     | $2.6 \times 10^{-4}$            | Urea                     | 0.679                                       |
| Urea                     | 1.69                | myo-Inositol 1-phosphate | $5.2 \times 10^{-4}$            | myo-Inositol 1-phosphate | 0.684                                       |
| Glutamine                | 1.58                | Glucose                  | $4.7 \times 10^{-3}$            | Mannose                  | 0.711                                       |
| Glucose                  | 1.41                | beta alanine             | 0.041                           | Glucose                  | 0.721                                       |
| d-Erythrotetrofuranose   | 1.32                | Inosine                  | 0.045                           | 3-Phosphoglyceric acid   | 0.728                                       |
| Fructose 1-phosphate     | 1.30                |                          |                                 | Inosine                  | 0.753                                       |
| Cysteine                 | 1.19                |                          |                                 | Fructose                 | 0.788                                       |
| Phenylalanine            | 1.09                |                          |                                 | Sucrose                  | 1.383                                       |
| Creatinine               | 1.06                |                          |                                 |                          |                                             |
| Fumaric acid             | 1.05                |                          |                                 |                          |                                             |
| Succinic acid            | 1.03                |                          |                                 |                          |                                             |

**Table S3.** Metabolite pathway enrichment analysis affected by short-term and long-term exposure comparisons.

| Pathway Name                                        | Match<br>Status | <i>p</i> -value | FDR       | Impact  |
|-----------------------------------------------------|-----------------|-----------------|-----------|---------|
| Valine, leucine and isoleucine biosynthesis         | 3/8             | 4.905E-5        | 0.0020601 | 0.0     |
| Arginine biosynthesis                               | 3/14            | 3.0695E-4       | 0.0085946 | 0.11675 |
| Pantothenate and CoA biosynthesis                   | 3/19            | 7.9167E-4       | 0.015548  | 0.0     |
| Fructose and mannose metabolism                     | 3/20            | 9.255E-4        | 0.015548  | 0.12802 |
| Alanine, aspartate and glutamate metabolism         | 3/28            | 0.0025282       | 0.035395  | 0.42068 |
| Histidine metabolism                                | 2/16            | 0.011023        | 0.11574   | 0.0     |
| Galactose metabolism                                | 2/27            | 0.030179        | 0.26276   | 0.0     |
| Glutathione metabolism                              | 2/28            | 0.032306        | 0.26276   | 0.02309 |
| Phenylalanine, tyrosine and tryptophan biosynthesis | 1/4             | 0.040694        | 0.26276   | 0.5     |
| Glyoxylate and dicarboxylate metabolism             | 2/32            | 0.041386        | 0.26276   | 0.0     |
| Glycine, serine and threonine metabolism            | 2/33            | 0.043793        | 0.26276   | 0.0029  |
| Cysteine and methionine metabolism                  | 2/33            | 0.043793        | 0.26276   | 0.09592 |

**Table S4.** 10 individual GA runs clustering information table, E = binding energy (kcal/mol); Ki = inhibition constant (μM)

|    | GPT          |              | PAH          |             | RK           |              | CAH          |              | BCAT         |              |
|----|--------------|--------------|--------------|-------------|--------------|--------------|--------------|--------------|--------------|--------------|
|    | E            | KI           | E            | KI          | E            | KI           | E            | KI           | E            | KI           |
| 1  | -5.14        | 169.38       | <b>-6.92</b> | <b>8.41</b> | -5.64        | 73.77        | -5.07        | 193.77       | -4.96        | 231.78       |
| 2  | -5.02        | 210.83       | -5.38        | 114.56      | -5.29        | 131.59       | -5.50        | -            | -4.99        | 221.34       |
| 3  | <b>-5.76</b> | <b>59.51</b> | -5.91        | 46.90       | -5.12        | 176.46       | -4.92        | 245.85       | -5.44        | 102.85       |
| 4  | -4.77        | 316.80       | -5.04        | 201.68      | -5.58        | 81.12        | -5.10        | 184.18       | -4.62        | 408.38       |
| 5  | -5.17        | 161.50       | -5.51        | -           | -4.88        | 264.52       | -5.39        | 111.49       | -4.72        | 349.02       |
| 6  | -4.81        | 300.53       | -4.77        | 317.41      | -4.58        | 440.67       | -5.00        | 215.61       | -4.94        | 240.83       |
| 7  | -4.84        | 283.35       | -5.77        | 58.83       | -4.76        | -            | -5.56        | 83.75        | -5.10        | 182.54       |
| 8  | -4.86        | 272.30       | -5.67        | 69.48       | -5.51        | 91.71        | <b>-5.59</b> | <b>79.65</b> | -4.70        | -            |
| 9  | -5.00        | 214.69       | -6.54        | 16.09       | <b>-6.52</b> | <b>16.73</b> | -5.28        | 135.26       | -4.49        | 512.49       |
| 10 | -5.12        | 176.38       | -4.56        | 454.38      | -5.75        | 61.05        | -5.60        | 79.12        | <b>-6.30</b> | <b>23.95</b> |
